# Supplementary material for: Assessing the Joint Impact of Climatic Variables on Meteorological Drought Using Machine Learning
Source: Frontiers journal article supplement (doi:10.3389/feart.2022.835142), 2022-03-09
Supplement: Data_Sheet_1.docx [file Data_Sheet_1.docx]

**Supplementary Information**


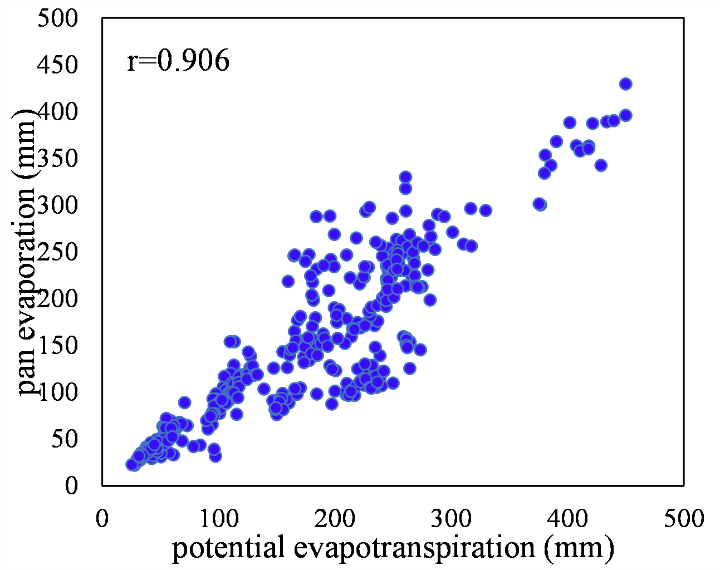


**Figure. S1** Correlation of evaporative demand and pan evaporationin 1981-2016


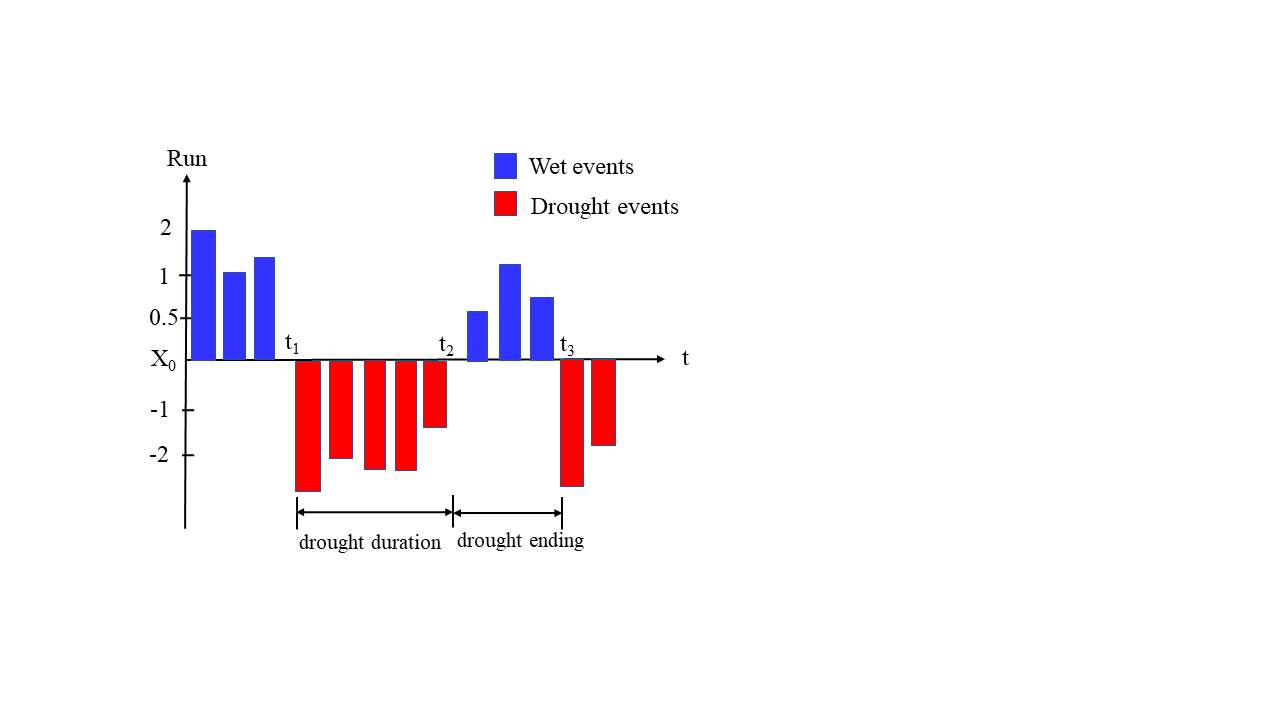


**Figure. S2** The concept map of the run theory
